# Supplementary material
Source: publisher figshare collection journal article supplement (https://acs.figshare.com/ndownloader/files/12403496)
Supplement: Supplementary file 1 [file 12403496]

**Design of a New Glutamine–Fipronil Conjugate with  $\alpha$ -Amino Acid  
Function and Its Uptake by *A. thaliana* Lysine Histidine Transporter  
1 (*AtLHT1*)**

Xunyuan Jiang,<sup>†,§</sup> Yun Xie,<sup>†,§</sup> Zhanfu Ren,<sup>†</sup> Ulrika Ganeteg,<sup>‡</sup> Fei Lin,<sup>†</sup> Chen Zhao<sup>\*,†</sup>  
and Hanhong Xu<sup>\*,†</sup>

<sup>†</sup>State Key Laboratory for Conservation and Utilization of Subtropical  
Agro-Bioresources and Key Laboratory of Natural Pesticide and Chemical Biology,  
Ministry of Education, South China Agricultural University, Guangzhou 510642,  
China

<sup>‡</sup>Umeå Plant Science Centre, Department of Forest Genetics and Plant Physiology,  
Swedish University of Agricultural Sciences, SE-901 83 Umeå, Sweden

**Corresponding Authors**

\*(C.Z.) Tel: +86-20-85285127. E-mail: zhaoc@scau.edu.cn.

\*(H.X.) Tel: +86-20-85285127. E-mail: hhxu@scau.edu.cn.

**Author Contributions**

<sup>§</sup>All authors conceived and designed the study. X.J. and Y.X. contributed equally to this work. X.J. designed, synthesized the compounds and wrote the manuscript. Y.X. and Z.R. performed the biology experiments and HPLC data analyses.

**Supporting Information Available:**

Structures and net charges of neutral amino acid-fipronil conjugates.....Table S1

LC<sub>50</sub> values of L-GlnF, D-GlnF and fipronil against *Plutella xylostella*.....Table S2

Prediction of phloem mobility of L- /D-GlnF using a Kleier map.....Figure S1

This material is available free of charge via the Internet at <http://pubs.acs.org>.

**Table S1.** Structures and Net Charges of Neutral Amino Acid-Fipronil Conjugates.

| Structure                                                                           | Conjugated Amino Acid | Net Charge <sup>a</sup> |
|-------------------------------------------------------------------------------------|-----------------------|-------------------------|
| 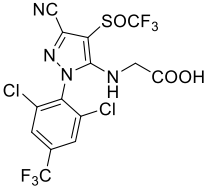   | Glycine (Gly)         | Electronegative         |
|    | Alanine (Ala)         | Electronegative         |
|   | Valine (Val)          | Electronegative         |
|  | Leucine (Leu)         | Electronegative         |
|  | Isoleucine (Ile)      | Electronegative         |
|  | Phenylalanine (Phe)   | Electronegative         |

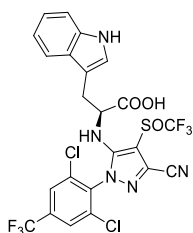

Tryptophan (Trp)

Electronegative

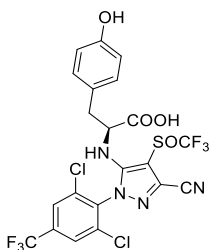

Tyrosine (Tyr)

Electronegative

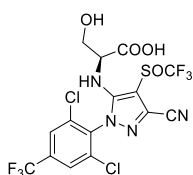

Threonine (Thr)

Electronegative

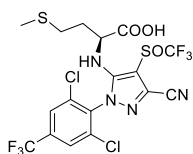

Methionine (Met)

Electronegative

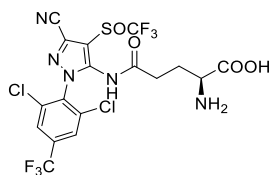

Glutamine (Gln)

Electroneutral

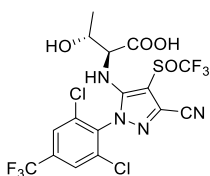

Serine (Ser)

Electronegative

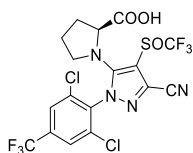

Proline (Pro)

Electronegative

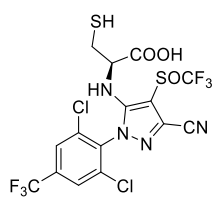

Cysteine (Cys)

Electronegative

---

<sup>a</sup>Net charges were measured at the plant physiology pH 5.6.

**Table S2.** LC<sub>50</sub> values of L-GlnF, D-GlnF and fipronil against *Plutella xylostella*

| Compound | $y = a + bx$       | LC <sub>50</sub> (mg L <sup>-1</sup> ) <sup>a</sup> | R    |
|----------|--------------------|-----------------------------------------------------|------|
| L-GlnF   | $y = 3.81 + 1.61x$ | 5.46                                                | 0.99 |
| D-GlnF   | $y = 2.94 + 2.38x$ | 7.36                                                | 0.97 |
| fipronil | $y = 4.25 + 1.56x$ | 3.02                                                | 0.97 |

<sup>a</sup>Evaluated by leaf disk dipping assay following procedures in literature.<sup>1</sup>

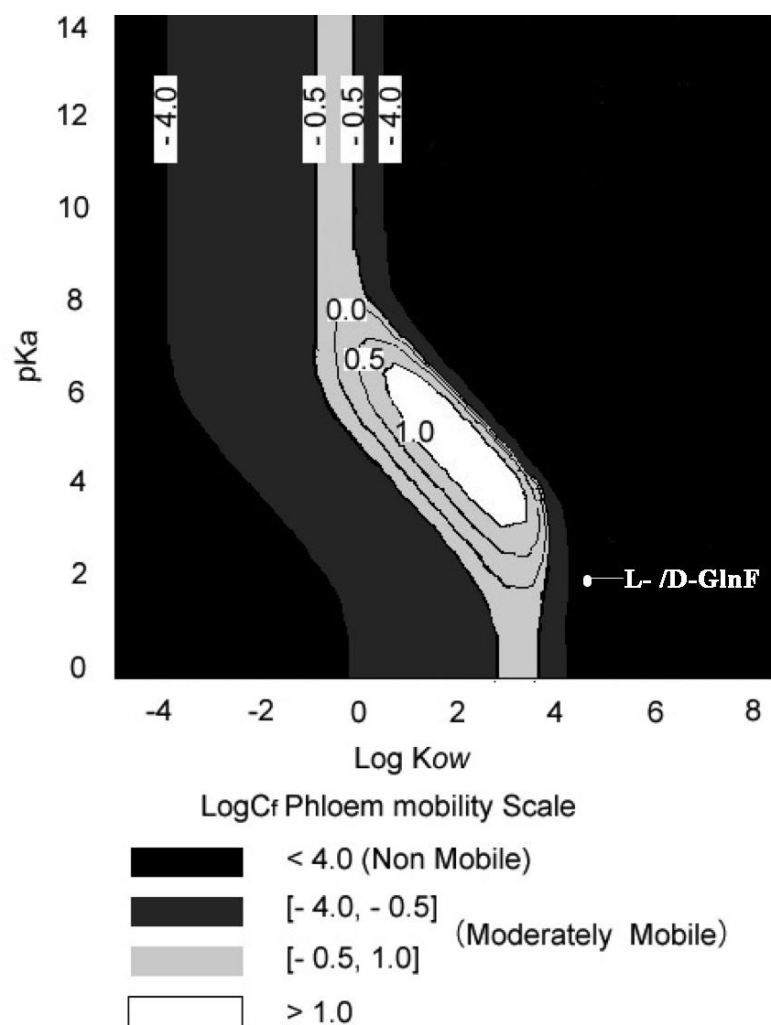

**Figure S1.** Prediction of phloem mobility of L-/D-GlnF using a Kleier map. L-/D-GlnF is located in the non-phloem mobile area. Log K<sub>ow</sub> and pK<sub>a</sub> were calculated by the ACD Laboratories Percepta Program, version 14.0.

## References:

- (1) Xia, Q.; Wen, Y.; Hao, W.; Li, Y.; Xu, H.  $\beta$ -Glucosidase involvement in the bioactivation of glycosyl conjugates in plants: synthesis and metabolism of four



glycosidic bond conjugates in vitro and in vivo. *J. Agric. Food Chem.* **2014**, *62*, 11037–11046.
